# Supplementary material
Source: PubMed Central journal article supplement (PMC3060593)
Supplement: tjp0589-1143-SD1.pdf [file tjp0589-1143-SD1.pdf]

Supplementary Table B: Response features of individual IID sensitive LSO neurons.

| wild-type                              |                            |                            |                 |                           |                         |                                |                                |                 |                |                              | knockout                               |                            |                            |                 |                           |                         |                                |                                |                 |                |                              |
|----------------------------------------|----------------------------|----------------------------|-----------------|---------------------------|-------------------------|--------------------------------|--------------------------------|-----------------|----------------|------------------------------|----------------------------------------|----------------------------|----------------------------|-----------------|---------------------------|-------------------------|--------------------------------|--------------------------------|-----------------|----------------|------------------------------|
| <i>Kcna1</i> <sup>+/+</sup><br>unit-ID | CF <sub>exc</sub><br>(kHz) | CF <sub>inh</sub><br>(kHz) | Q <sub>10</sub> | spont. rate<br>(spikes/s) | max. rate<br>(spikes/s) | thr <sub>exc</sub><br>(dB SPL) | thr <sub>inh</sub><br>(dB SPL) | latency<br>(ms) | jitter<br>(ms) | ISI <sub>onset</sub><br>(ms) | <i>Kcna1</i> <sup>+/+</sup><br>unit-ID | CF <sub>exc</sub><br>(kHz) | CF <sub>inh</sub><br>(kHz) | Q <sub>10</sub> | spont. rate<br>(spikes/s) | max. rate<br>(spikes/s) | thr <sub>exc</sub><br>(dB SPL) | thr <sub>inh</sub><br>(dB SPL) | latency<br>(ms) | jitter<br>(ms) | ISI <sub>onset</sub><br>(ms) |
| Kv01404                                | 41.4                       | 41.4                       | 3.04            | 1.0                       | 229.3                   | 45                             | 50                             | -               | -              | -                            | Kv03503                                | 12.6                       | 14.6                       | 0.35            | 4.8                       | 280.0                   | 50                             | 75                             | 3.2             | 1.9            | 3.2                          |
| Kv01405                                | 41.4                       | -                          | 3.16            | 0.0                       | 104.0                   | 55                             | -                              | -               | -              | -                            | Kv03504                                | 10.5                       | -                          | 0.31            | 13.2                      | 58.0                    | 55                             | -                              | 5.7             | 4.8            | 5.0                          |
| Kv01418                                | 19.6                       | -                          | 1.59            | 1.3                       | 50.7                    | 25                             | -                              | 14.1            | 6.0            | 10.5                         | Kv09807                                | 5.7                        | 8.3                        | 2.88            | 0.4                       | 96.0                    | 46                             | 40                             | 3.5             | 0.9            | 12.4                         |
| Kv05007                                | 10.0                       | 10.0                       | 1.90            | 7.6                       | 158.0                   | 20                             | 20                             | 3.8             | 0.1            | 2.1                          | Kv10610                                | 22.4                       | -                          | 1.72            | 0.0                       | 79.3                    | 68                             | -                              | 5.9             | 4.4            | 10.7                         |
| Kv05013                                | 16.5                       | -                          | 3.73            | 2.5                       | 34.0                    | 30                             | -                              | 3.9             | 0.1            | 1.4                          | Kv14701                                | 13.5                       | 9.2                        | 6.66            | 0.0                       | 26.0                    | 30                             | 50                             | 5.8             | 0.2            | 1.6                          |
| Kv05105                                | 42.9                       | 10.5                       | 4.22            | 0.0                       | 97.3                    | 38                             | 70                             | 3.7             | 0.2            | 2.0                          | Kv15701                                | 27.0                       | -                          | 2.55            | 0.0                       | 160.7                   | 62                             | -                              | 5.8             | 0.7            | 2.9                          |
| Kv05107                                | 39.3                       | 10.5                       | 2.22            | 0.0                       | 72.7                    | 50                             | 70                             | 3.9             | 0.2            | 3.0                          | Kv15703                                | 13.0                       | 42.9                       | 0.76            | 0.0                       | 32.0                    | 70                             | 75                             | 7.1             | 1.6            | 3.9                          |
| Kv05109                                | 22.1                       | 23.8                       | 3.66            | 0.1                       | 70.7                    | 30                             | 30                             | 3.3             | 0.2            | 2.1                          | Kv15706                                | 27.1                       | 39.2                       | 1.36            | 48.4                      | 132.7                   | 78                             | 72                             | 10.0            | 4.2            | 7.7                          |
| Kv05110                                | 7.7                        | 8.1                        | 0.67            | 1.9                       | 262.7                   | 58                             | 45                             | 3.9             | 0.1            | 1.3                          | Kv15708                                | 12.6                       | -                          | 1.77            | 5.4                       | 285.3                   | 54                             | -                              | 4.2             | 0.4            | 1.8                          |
| Kv05111                                | 13.5                       | 7.7                        | 0.32            | 6.0                       | 231.3                   | 50                             | 50                             | 3.7             | 0.1            | 2.6                          | Kv15709                                | 10.6                       | 25.0                       | 1.07            | 0.0                       | 198.0                   | 66                             | 65                             | 5.7             | 1.6            | 4.0                          |
| Kv05112                                | 41.4                       | 28.5                       | 0.96            | 16.6                      | 163.3                   | 45                             | 45                             | 5.2             | 0.5            | 4.6                          | Kv15711                                | 10.5                       | 23.6                       | 1.56            | 0.0                       | 46.0                    | 66                             | 45                             | 4.3             | 0.3            | 1.8                          |
| Kv05113                                | 12.1                       | 16.9                       | 2.39            | 0.3                       | 318.0                   | 5                              | 20                             | 3.4             | 0.1            | 4.1                          | Kv15714                                | 11.5                       | 26.4                       | 0.55            | 31.6                      | 334.7                   | 58                             | 70                             | 3.9             | 0.7            | 3.0                          |
| Kv06601                                | 31.5                       | 23.2                       | 4.64            | 25.6                      | 69.3                    | 50                             | 70                             | 10.0            | 17.9           | 9.1                          | Kv15716                                | 10.2                       | 9.1                        | 0.53            | 0.0                       | 31.3                    | 72                             | 66                             | 5.9             | 2.2            | 2.7                          |
| Kv06605                                | 7.7                        | 41.4                       | 0.18            | 1.6                       | 252.0                   | 46                             | 30                             | 3.7             | 0.8            | 1.4                          | Kv15717                                | 14.7                       | 10.2                       | 1.44            | 0.4                       | 26.0                    | 66                             | 75                             | 4.6             | 0.2            | 1.5                          |
| Kv06610                                | 10.5                       | -                          | 1.18            | 0.6                       | 68.0                    | 66                             | -                              | 4.4             | 0.6            | 4.3                          | Kv16107                                | 12.6                       | 23.6                       | 1.34            | 0.0                       | 233.3                   | 63                             | 55                             | 9.2             | 0.8            | 6.7                          |
| Kv06611                                | 10.5                       | -                          | 1.17            | 0.0                       | 60.7                    | 72                             | -                              | 5.9             | 1.0            | 3.2                          | Kv16108                                | 31.5                       | -                          | 1.03            | 0.0                       | 228.7                   | 54                             | -                              | -               | -              | -                            |
| Kv06612                                | 10.5                       | 22.9                       | 1.41            | 0.0                       | 232.0                   | 57                             | 20                             | 4.5             | 0.3            | -                            | Kv16111                                | 8.6                        | 9.0                        | 2.20            | 0.3                       | 128.0                   | 40                             | 35                             | 5.7             | 1.2            | 5.8                          |
| Kv06614                                | 12.0                       | 9.7                        | 2.84            | 0.0                       | 172.0                   | 30                             | 60                             | 3.4             | 0.1            | 12.0                         | Kv17101                                | 8.8                        | 8.8                        | 1.33            | 1.1                       | 213.3                   | 20                             | 25                             | 4.1             | 0.3            | 6.9                          |
| Kv08503                                | 14.7                       | 21.0                       | 1.12            | 0.1                       | 280.0                   | 20                             | 20                             | 4.0             | 0.3            | 3.5                          | Kv17103                                | 15.3                       | 23.9                       | 0.73            | 0.0                       | 267.3                   | 50                             | 50                             | -               | -              | -                            |
| Kv08504                                | 13.4                       | 17.6                       | 1.84            | 3.3                       | 256.7                   | 50                             | 20                             | 4.4             | 0.4            | 2.1                          | Kv17104                                | 6.2                        | 7.3                        | 1.75            | 0.1                       | 88.7                    | 40                             | 30                             | 4.3             | 0.6            | 7.9                          |
| Kv08505                                | 10.2                       | 14.6                       | 0.91            | 0.9                       | 175.3                   | 50                             | 45                             | 4.1             | 0.2            | 1.7                          | Kv17105                                | 5.4                        | 7.3                        | 2.18            | 1.3                       | 148.0                   | 30                             | 45                             | 3.7             | 0.2            | 8.6                          |
| Kv11109                                | 27.6                       | -                          | 2.07            | 0.1                       | 60.7                    | 72                             | -                              | -               | -              | -                            | Kv18104                                | 23.2                       | -                          | 1.03            | 0.1                       | 47.3                    | 60                             | -                              | -               | -              | -                            |
| Kv11115                                | 12.6                       | 14.6                       | 1.48            | 0.6                       | 152.7                   | 40                             | 50                             | 2.8             | 0.1            | 2.9                          | Kv18106                                | 15.2                       | -                          | 0.92            | 0.0                       | 12.7                    | 60                             | -                              | 3.4             | 0.2            | 3.0                          |
| Kv11116                                | 12.1                       | 15.5                       | 1.74            | 0.1                       | 156.7                   | 54                             | 55                             | 2.9             | 0.2            | 2.7                          | Kv18107                                | 26.3                       | 37.7                       | 0.72            | 0.0                       | 368.0                   | 63                             | 55                             | 5.8             | 0.2            | 1.5                          |
| Kv18204                                | 10.5                       | -                          | 1.21            | 0.0                       | 221.3                   | 66                             | -                              | 4.2             | 1.0            | 2.2                          | Kv18109                                | 27.1                       | -                          | 0.83            | 0.8                       | 210.0                   | 60                             | -                              | -               | -              | -                            |
| Kv18206                                | 26.4                       | -                          | 1.04            | 0.0                       | 261.3                   | 63                             | -                              | 5.7             | 0.4            | 2.3                          | Kv18110                                | 5.6                        | 31.3                       | 0.27            | 0.9                       | 64.0                    | 60                             | 75                             | 3.8             | 0.2            | 1.6                          |
| Kv18207                                | 8.7                        | -                          | 0.88            | 0.6                       | 232.0                   | 60                             | -                              | 4.4             | 0.3            | 2.4                          | Kv18113                                | 27.0                       | -                          | 1.15            | 0.0                       | 12.7                    | 76                             | -                              | 4.3             | 0.4            | 1.5                          |
| Kv18208                                | 16.5                       | -                          | 1.35            | 0.0                       | 264.0                   | 63                             | -                              | 5.7             | 0.6            | 3.4                          | Kv18115                                | 26.4                       | 27.1                       | 2.53            | 0.8                       | 154.7                   | 64                             | 65                             | 4.5             | 0.3            | 1.2                          |
|                                        |                            |                            |                 |                           |                         |                                |                                |                 |                |                              | Kv18116                                | 14.1                       | 27.0                       | 0.59            | 0.0                       | 191.3                   | 63                             | 60                             | 3.9             | 0.2            | 3.2                          |
|                                        |                            |                            |                 |                           |                         |                                |                                |                 |                |                              | Kv21201                                | 7.4                        | 11.0                       | 1.48            | 0.3                       | 70.7                    | 36                             | 30                             | 6.3             | 1.5            | 3.4                          |
|                                        |                            |                            |                 |                           |                         |                                |                                |                 |                |                              | Kv23507                                | 8.8                        | 8.8                        | 2.67            | 0.6                       | 30.7                    | 45                             | 65                             | 5.4             | 0.1            | 6.3                          |

Latency is expressed as the median value of first spike times that occurred in 250 stimulus repetitions at CF/80 dB SPL. Jitter is defined as the 25-75 % quartile range of first spike latencies. The onset ISI value represents the median ISI that appeared during the first 20 ms of the stimulus.

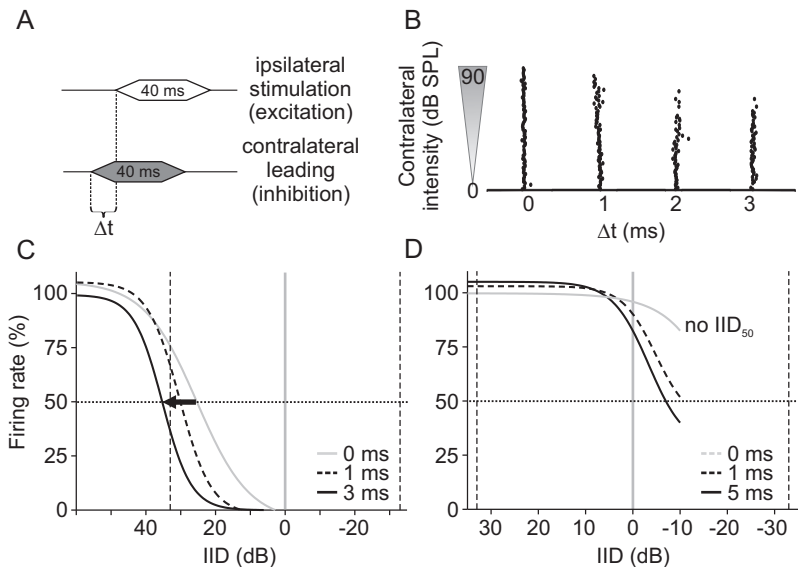

## Supplemental figure Karcz et al

**Time-intensity trading in IID processing.** (A) Temporal relation between ipsi- and contralateral stimulation. Signal duration 40 ms, contralateral signal precedes the ipsilateral signal by 1 to 10 ms. (B) Dot raster displays of a *Kcna1*<sup>-/-</sup> unit responding to different IIDs (ordinate shows varying contralateral sound intensity while ipsilateral intensity was kept constant) at lead times of 0, 1, 2, 3 ms of the ipsilateral stimulus (abscissa). When both stimuli started simultaneously, no APs were inhibited even at contralateral sound intensities of 90 dB. With an increase in lead time of the contralateral stimulus, AP generation was inhibited at successively lower contralateral sound intensities. (C) IID function of neuron, that already showed an IID<sub>50</sub> value at  $t=0$  ms. Increasing  $t$  resulted in shifts of IID<sub>50</sub> towards more positive IIDs as indicated by the arrow. (D) In *Kcna1*<sup>-/-</sup> mice, LSO units did not always receive enough inhibition to reach IID<sub>50</sub> values. Shown here is a neuron in which inhibition preceding the excitation by 1 or 5 ms caused additional rate reductions leading to definable IID<sub>50</sub> at negative IIDs. Thus, limitations in presenting intense enough sounds to evoke strong enough inhibition can be reduced by presenting the inhibitory tone at an earlier time.
